# Supplementary material for: Analysis and optimization of Polyhydroxyalkanoates production by environmental bacterial isolates from Nepal
Source: Research Square preprint supplement (doi:10.21203/rs.3.rs-5641446/v1), 2025-08-06
Supplement: Supplementary file 1 [file 17db2dacdf31d13e013aae90.docx]

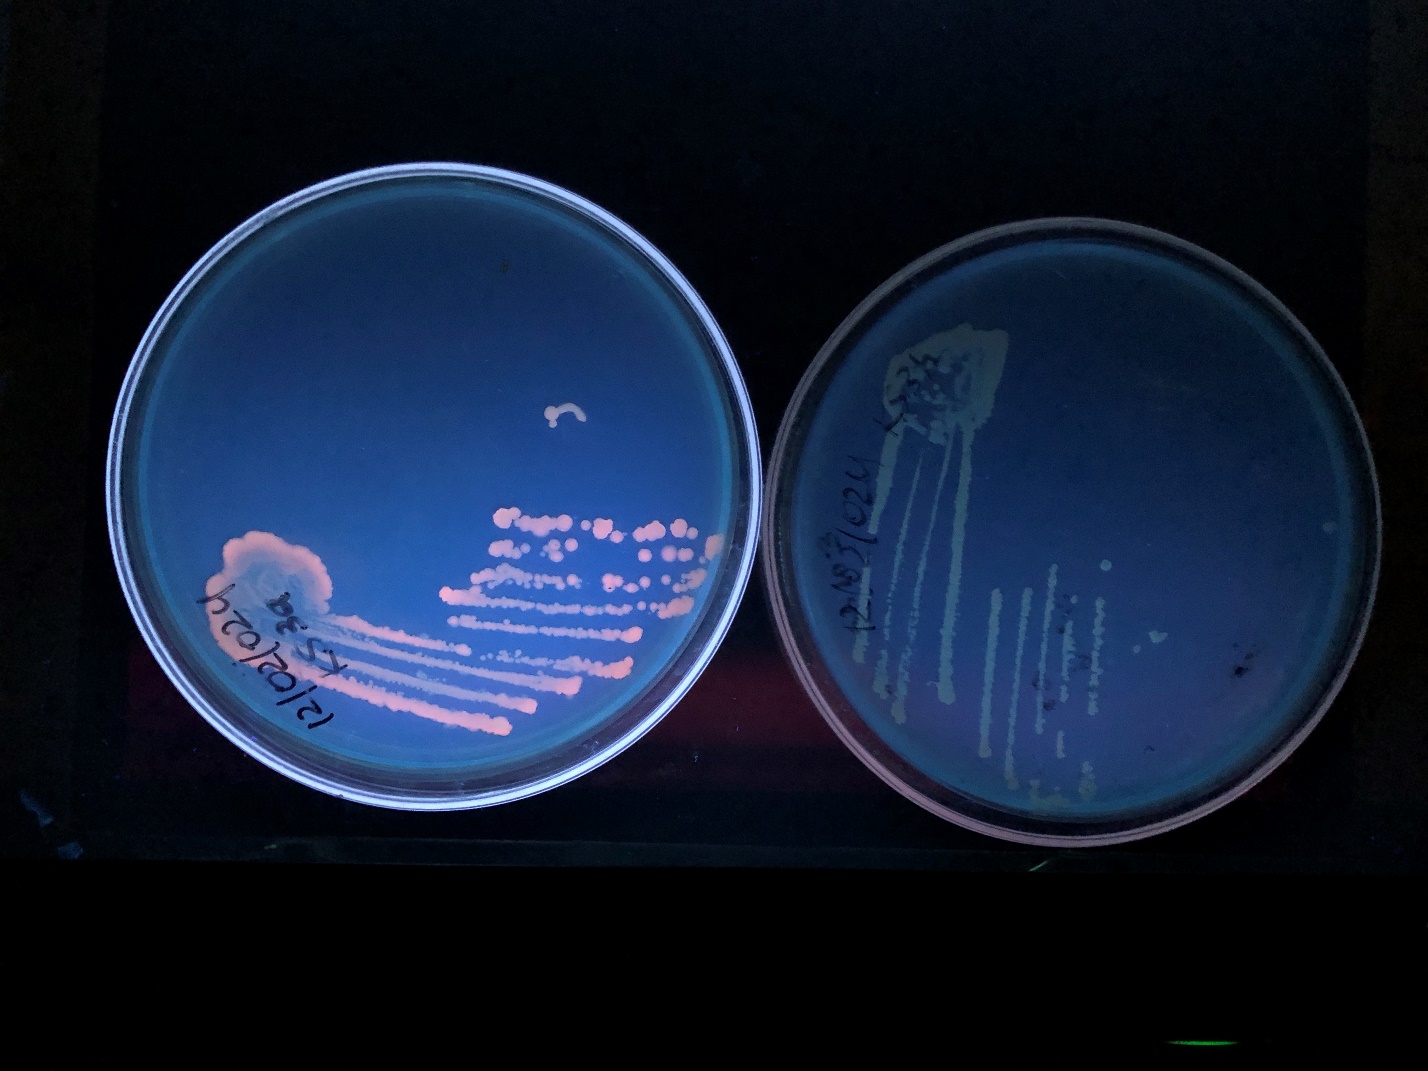

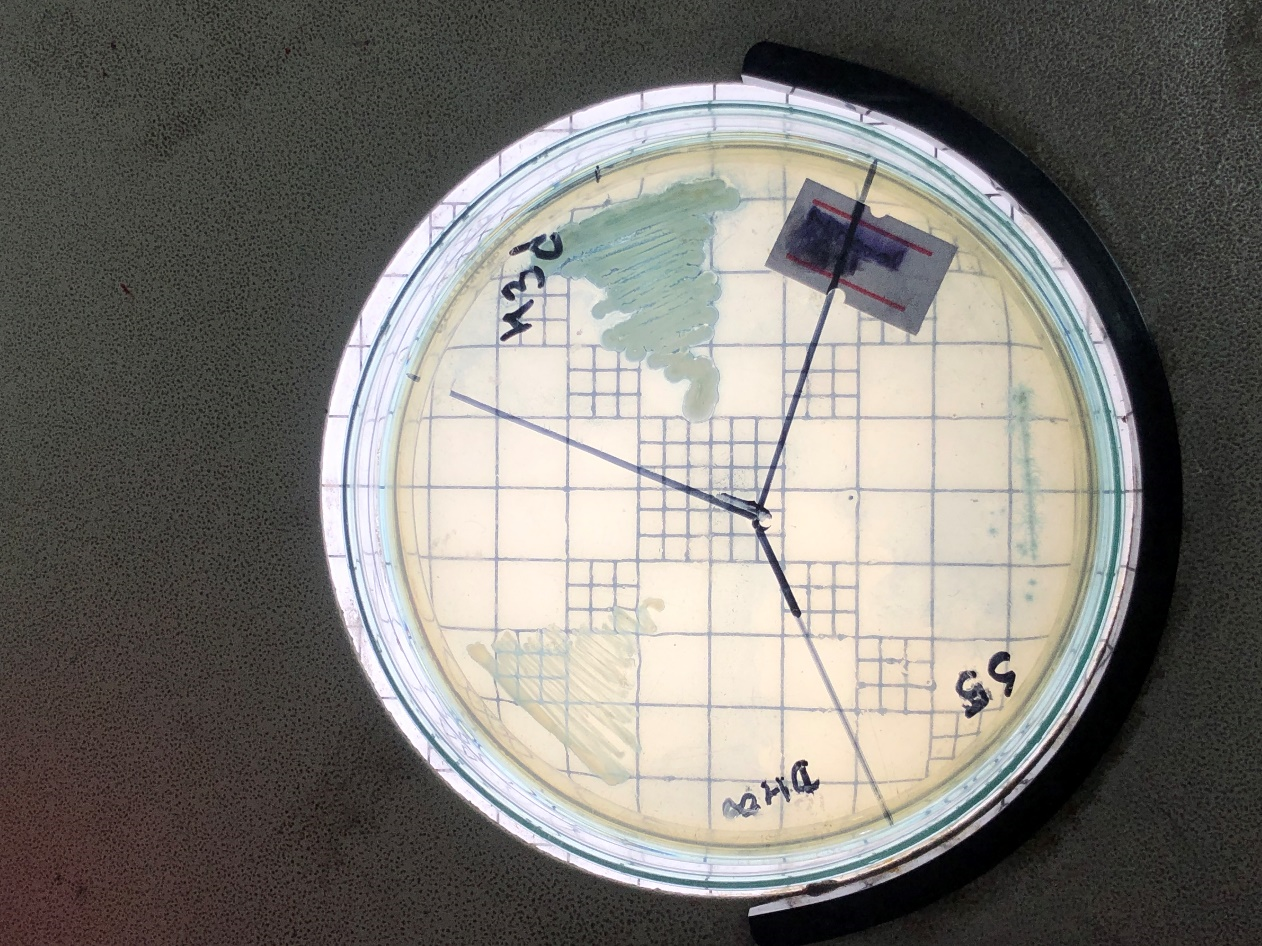


**Photograph 2:** Secondary screening of isolate Ks3a with Nile Blue A

**Photograph 1:** Primary screening of isolate Ht3d with Sudan Black B


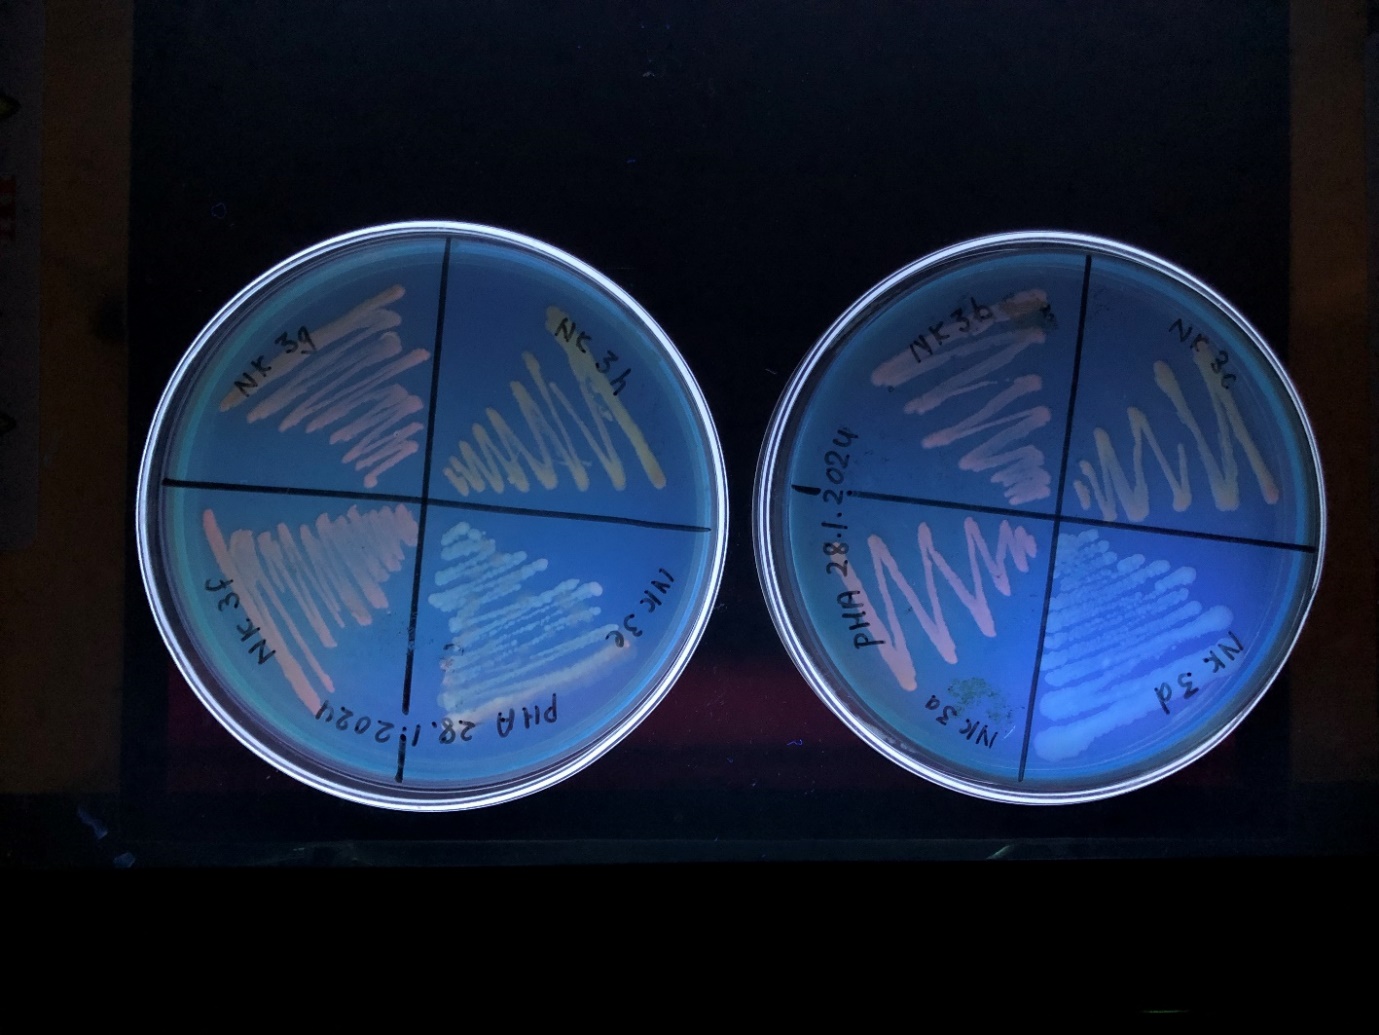

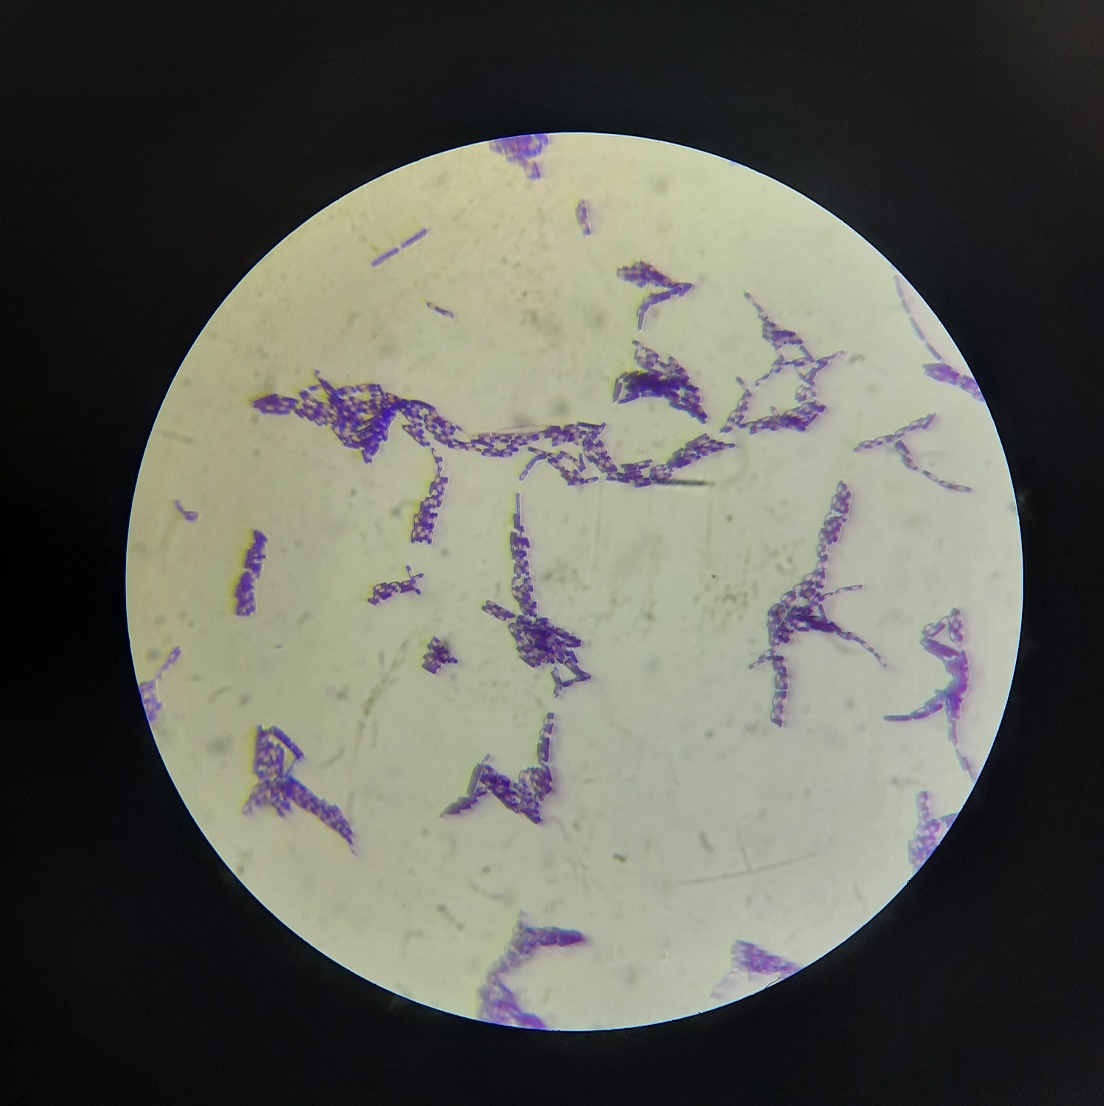


**Photograph 3:** Differential UV fluorescence of compost isolates on PHA detecting agar

**Photograph 4:** Gram staining of isolate Ht3d


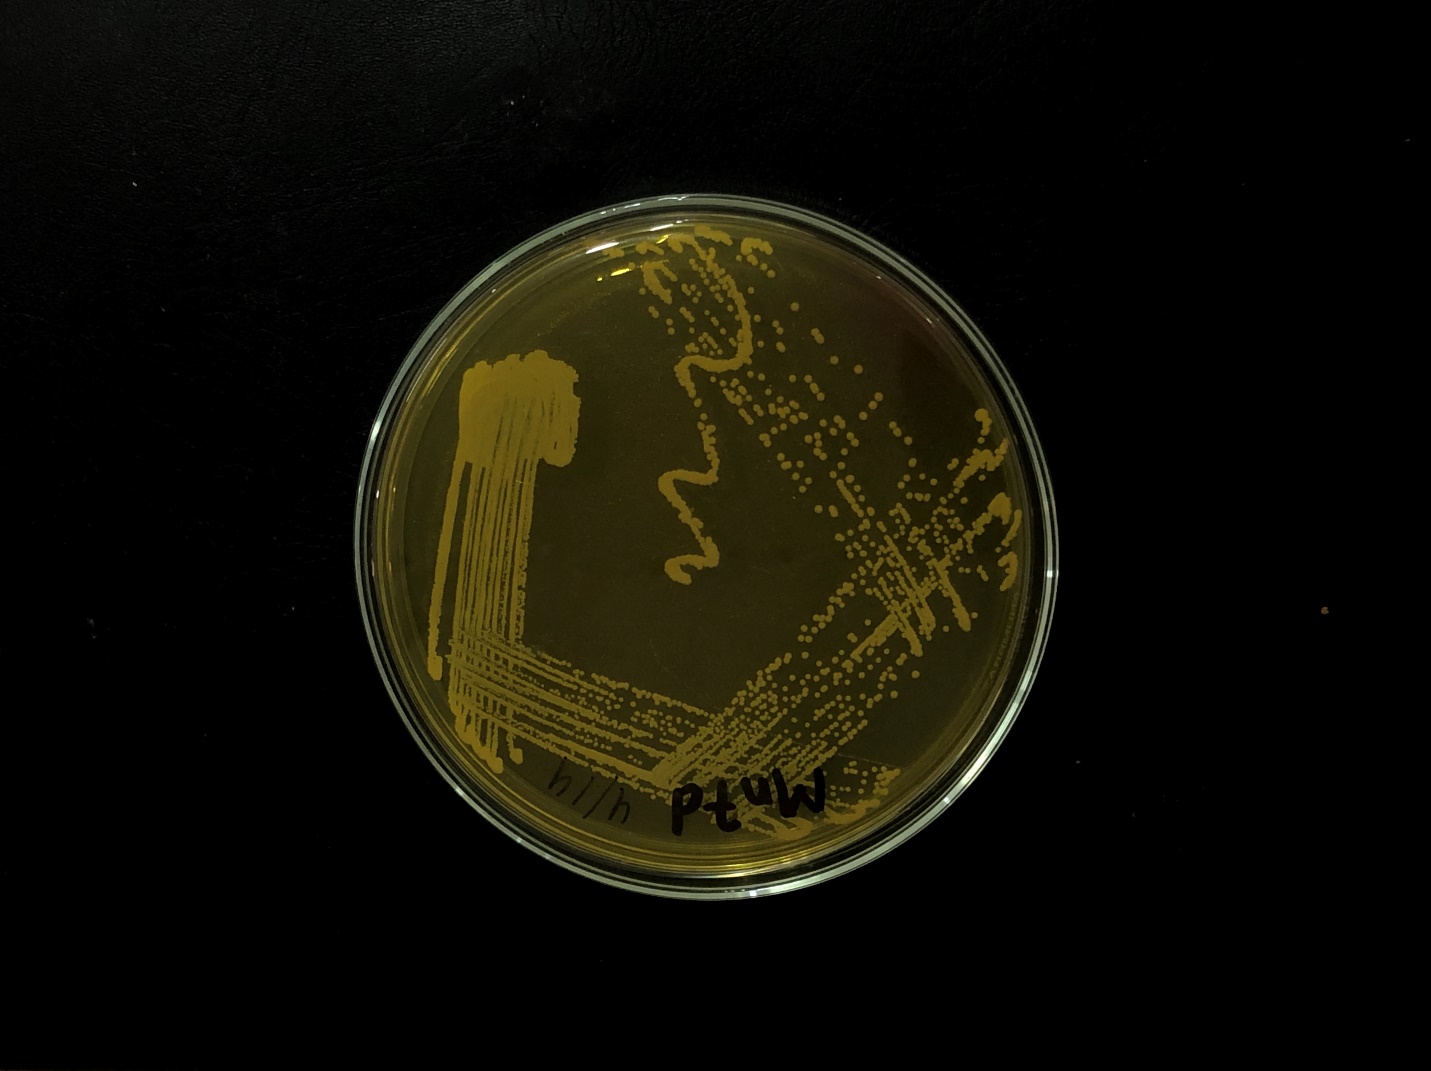

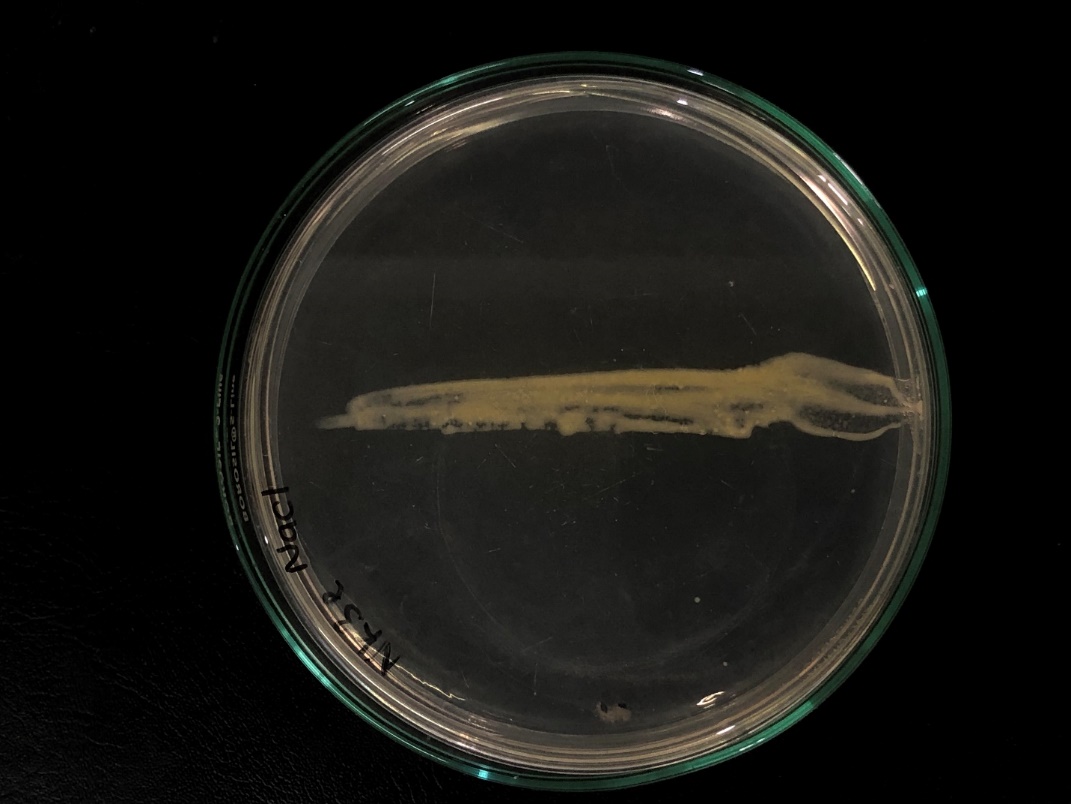


**Photograph 6:** Growth of isolate Mn7d on Mannitol Salt Agar

**Photograph 5:** Growth of isolate Nk3e on 6.5 % NaCl medium


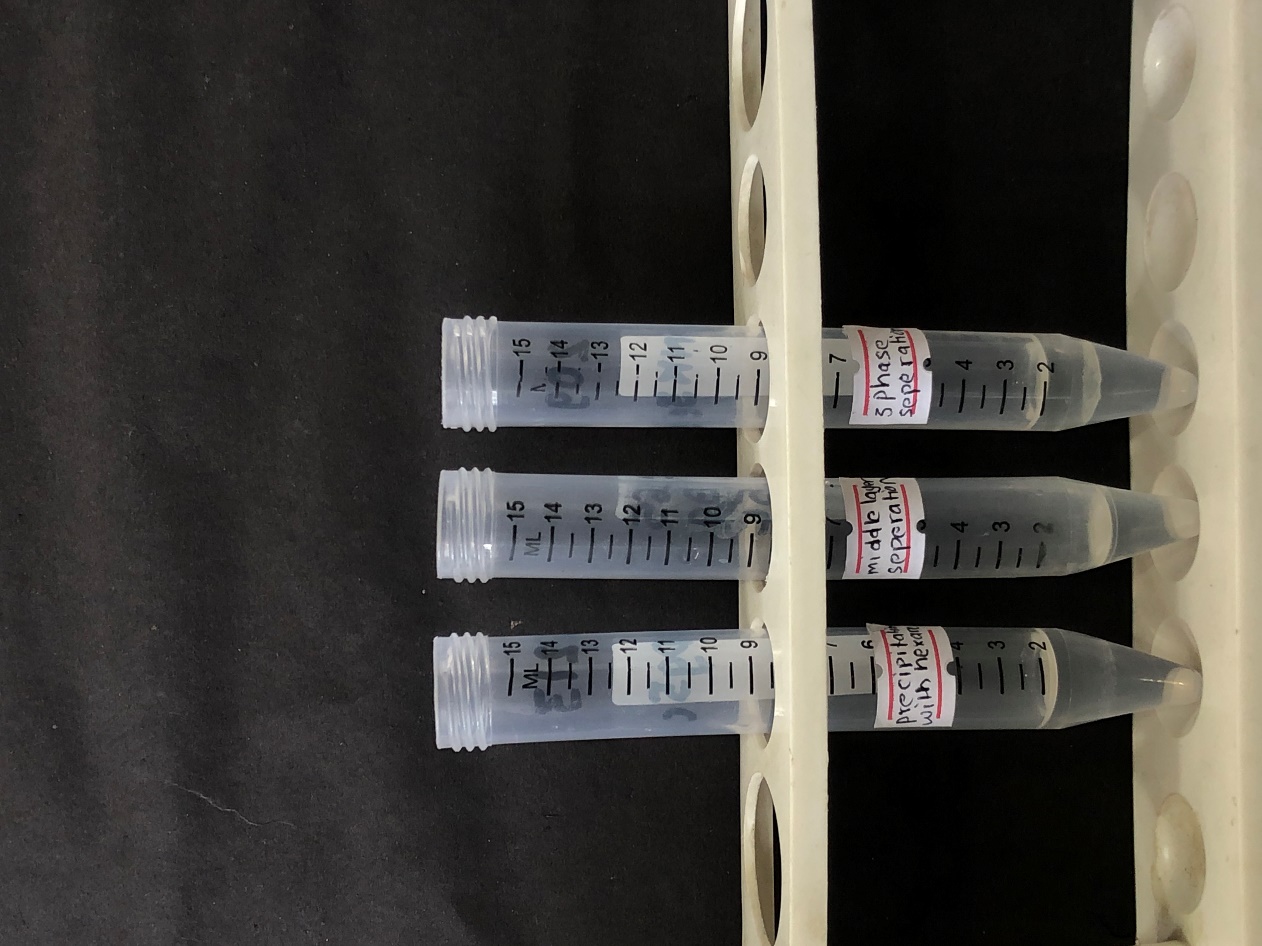

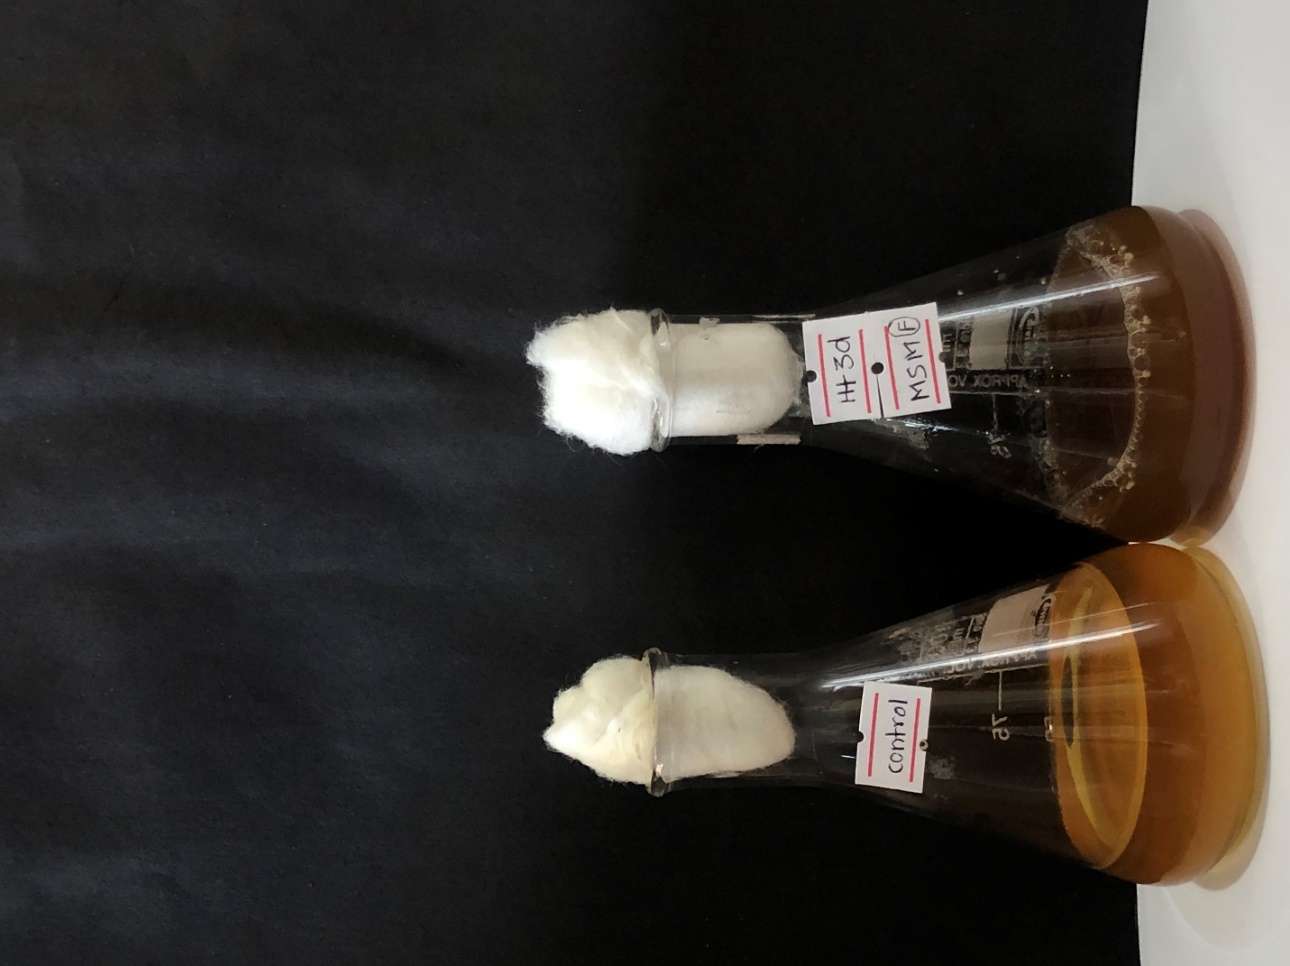


**Photograph 8:** Precipitation of PHA during extraction process

**Photograph 7:** Fermentation for PHA production using isolate Ht3d


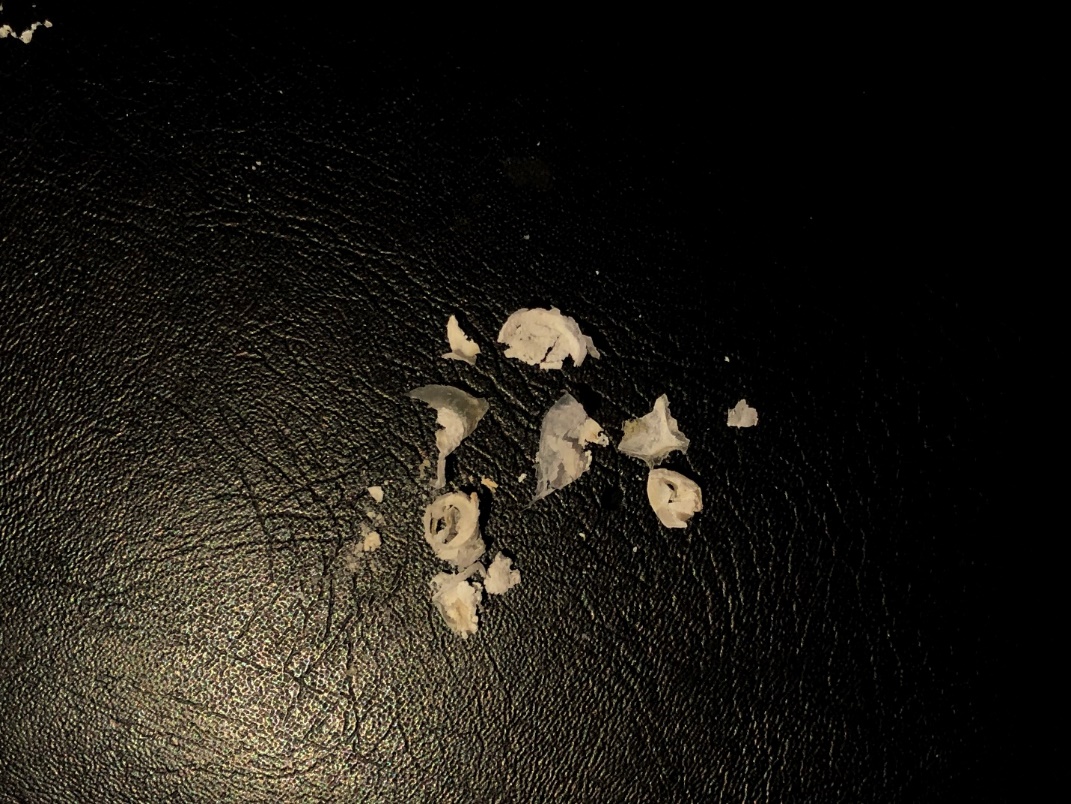

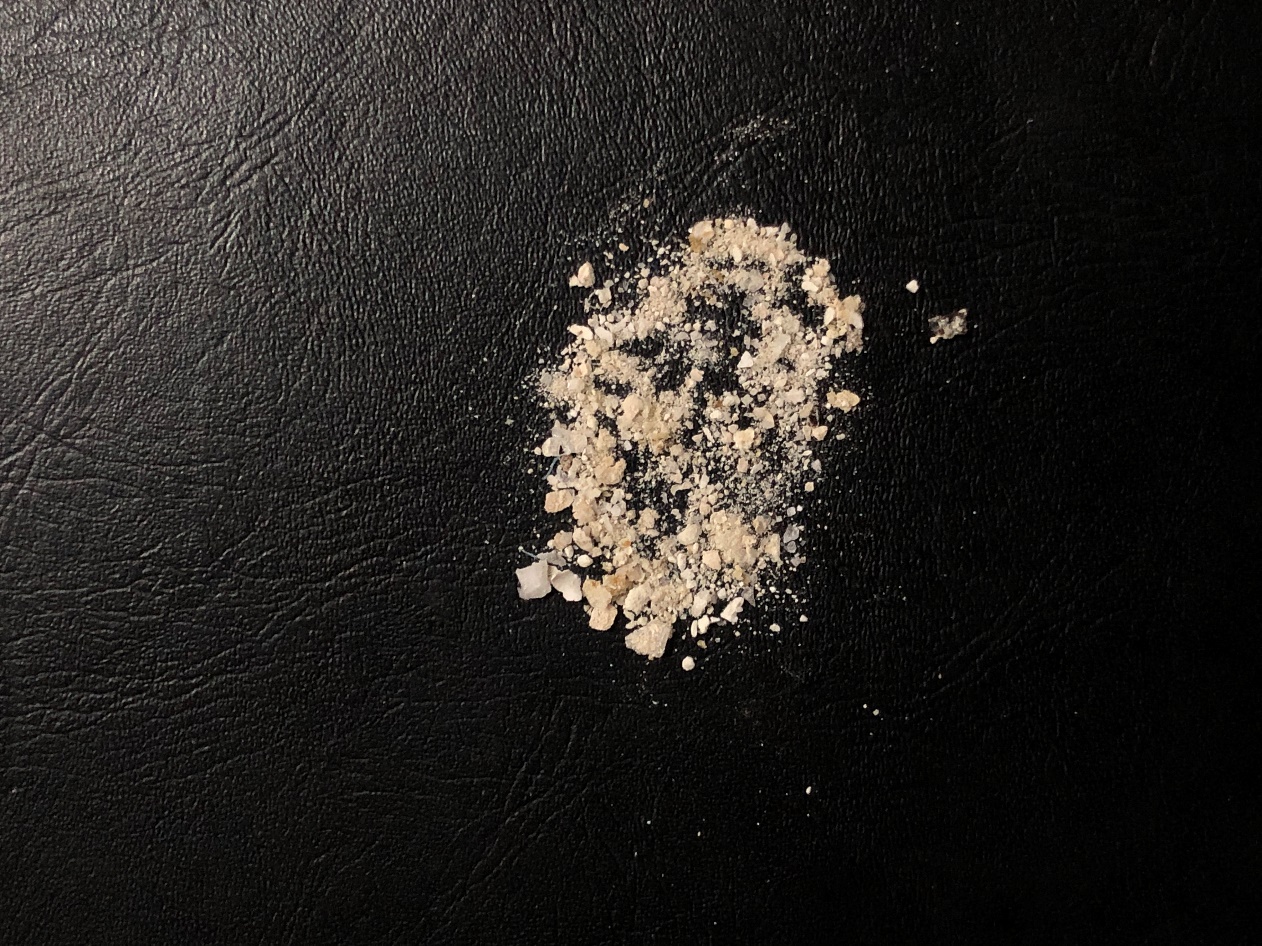


**Photograph 9:** PHA powder obtained after extraction process

**Photograph 10:** Preparation of PHA film
