# Supplementary material for: Analysis and optimization of Polyhydroxyalkanoates production by environmental bacterial isolates from Nepal
Source: Research Square preprint supplement (doi:10.21203/rs.3.rs-5641446/v1), 2025-08-06
Supplement: Supplementary file 2 [file 5b5f5f7f7a020bcded1e81fc.docx]

**Supplementary Materials**

Supplementary material includes –

Number of pages: I – VIII

Number of tables: 3

Number of figures: 2

**SUPPLEMENTARY SECTION A**

**ENUMERATION OF POSITIVE ISOLATES DURING SCREENING**

**1. Primary Screening with Sudan Black B**

**Table 1:** Distribution of Sudan Black B positive bacterial isolates

| **Sample Type** | **Sample Site** | **Sample code** | **Number of positive**  **isolates** | **Total isolate** |
| --- | --- | --- | --- | --- |
| Soil | Hetauda | Ht | 10 | 39 |
| Simle | Sm | 7 |
| Butwal | Cg | 8 |
| Ghandruk | Gh | 11 |
| Syangja | Sy | 3 |
| Compost | Imadol | Im | 5 | 32 |
| Kaushaltar | Ks | 3 |
| Budhanilkantha | Bn | 2 |
| Butwal | Bt | 12 |
| Nakkhu | Nk | 10 |
| Landfill Site | Manohara | Mn | 18 | 46 |
| Balaju | Bl | 6 |
| Nayabasti | Nb | 2 |
| Gothatar | Sb | 11 |
| Jorpati | Nz | 9 |
| Sewage Sediments | Thankot | Kr | 20 | 72 |
| Tarkeshwor | Tk | 12 |
| Dhungedhara | Dg | 16 |
| Jorpati | Jr | 14 |
| Gothatar | Gt | 10 |

**2. Secondary Screening with Nile Blue A**

**Table 2:** Distribution of Nile Blue A positive bacterial isolates in sample

| **Sample Type** | **Sample Site** | **Sample code** | **Number of positive isolates** | **Total isolates** |
| --- | --- | --- | --- | --- |
| Soil | Hetauda | Ht | 8 | 18 |
| Simle | Sm | 3 |
| Butwal | Cg | 5 |
| Ghandruk | Gh | 0 |
| Syangja | Sy | 2 |
|  |  |  |  |  |
| Compost | Imadol | Im | 0 | 17 |
| Kaushaltar | Ks | 2 |
| Budhanilkantha | Bn | 2 |
| Butwal | Bt | 7 |
| Nakkhu | Nk | 6 |
|  |  |  |  |  |
| Landfill Site | Manohara | Mn | 9 | 15 |
| Balaju | Bl | 2 |
| Nayabasti | Nb | 0 |
| Gothatar | Sb | 3 |
| Jorpati | Nz | 1 |
|  |  |  |  |  |
| Sewage Sediments | Thankot | Kr | 11 | 31 |
| Tarkeshwor | Tk | 4 |
| Dhungedhara | Dg | 8 |
| Jorpati | Jr | 5 |
| Gothatar | Gt | 3 |

**SUPPLEMENTARY SECTION B**

**GRAM MORPHOLOGY OF THE POSITIVE STRAINS**

**Table 3:** Characteristics of Gram stained positive isolates

| **Sample** | **Isolates** | **Shape** | **Color** | **Inference** |
| --- | --- | --- | --- | --- |
| Soil | Sm3e | Rods | Purple | Gram Positive |
| Sm3f | Rods | Purple | Gram Positive |
| Sm5a | Rods | Red | Gram Negative |
| Ht3a | Rods | Purple | Gram Positive |
| Ht3b | Rods | Purple | Gram Positive |
| Ht3c | Rods | Purple | Gram Positive |
| Ht3d | Rods | Purple | Gram Positive |
| Ht3f | Cocci | Purple | Gram Positive |
| Ht3g | Rods | Purple | Gram Positive |
| Ht5a | Rods | Purple | Gram Positive |
| Ht5f | Cocci | Purple | Gram Positive |
| Cg3c | Rods | Purple | Gram Positive |
| Cg5a | Rods | Purple | Gram Positive |
| Cg1a | Cocci | Purple | Gram Positive |
| Cg1b | Rods | Purple | Gram Positive |
| Cg1c | Small Rods | Purple | Gram Positive |
| Sy3a | Rods | Purple | Gram Positive |
| Sy3b | Rods in chains | Purple | Gram Positive |
|  |  |  |  |  |
| Compost | Ks3a | Rods | Purple | Gram Positive |
| Ks3b | Rods | Purple | Gram Positive |
| Bn6a | Rods | Purple | Gram Positive |
| Bn6b | Rods | Purple | Gram Positive |
| Bt3b | Large Rods | Purple | Gram Positive |
| Bt3c | Rods | Purple | Gram Positive |
| Bt3e | Cocci | Purple | Gram Positive |
| Bt3g | Rods | Red | Gram Negative |
| Bt3h | Rods | Purple | Gram Positive |
| Bt3l | Rods | Purple | Gram Positive |
| Bt3m | Rods, chains | Purple | Gram Positive |
| NK3a | Cocci, cluster | Red | Gram Negative |
| NK3c | Rods | Red | Gram Negative |
| NK3e | Rods | Purple | Gram Positive |
| NK3f | Rods | Red | Gram Negative |
| NK3g | Rods | Red | Gram Negative |
| NK3i | Rods | Purple | Gram Positive |
|  |  |  |  |  |
| Landfill | Mn3a | Cocci, cluster | Purple | Gram Positive |
| Mn3d | Cocci, cluster | Purple | Gram Positive |
| Mn3e | Cocci | Purple | Gram Positive |
| Mn3f | Cocci, cluster | Purple | Gram Positive |
| Mn5e | Cocci, cluster | Purple | Gram Positive |
| Mn7a | Cocci, cluster | Purple | Gram Positive |
| Mn7b | Cocci | Purple | Gram Positive |
| Mn7c | Cocci, cluster | Purple | Gram Positive |
| Mn7d | Cocci, cluster | Purple | Gram Positive |
| Bl3a | Cocci | Purple | Gram Positive |
| Bl3d | Cocci, cluster | Purple | Gram Positive |
| Sb3a | Cocci | Purple | Gram Positive |
| Sb3c | Cocci cluster | Purple | Gram Positive |
| Nz7a | Rods, chain | Purple | Gram Positive |
| Sb3j | Small Rods | Purple | Gram Positive |
|  |  |  |  |  |
| Sewage | Kr3a | Cocci, cluster | Purple | Gram Positive |
| Kr3d | Cocci, cluster | Purple | Gram Positive |
| Kr3e | Small Rods | Purple | Gram Positive |
| Kr3f | Small Rods | Purple | Gram Positive |
| Kr3g | Rods | Purple | Gram Positive |
| Kr3m | Rods | Red | Gram Negative |
| Kr3o | Small Rods | Purple | Gram Positive |
| Kr3p | Rods | Purple | Gram Positive |
| Kr3r | Rods | Purple | Gram Positive |
| Kr3u | Rods | Purple | Gram Positive |
| Kr3x | Rods | Purple | Gram Positive |
| Tk3c | Rods | Purple | Gram Positive |
| Tk3g | Rods | Purple | Gram Positive |
| TK3h | Rods | Purple | Gram Positive |
| Tk3j | Rods | Purple | Gram Positive |
| Dg3a | Rods | Purple | Gram Positive |
| Dg3d | Rods | Purple | Gram Positive |
| Dg3j | Rods | Purple | Gram Positive |
| Dg3k | Rods | Purple | Gram Positive |
| Dg3l | Rods | Purple | Gram Positive |
| Dg3n | Rods, chain | Purple | Gram Positive |
| Dg5b | Rods | Purple | Gram Positive |
| Dg5c | Rods | Purple | Gram Positive |
| Gt3b | Rods | Purple | Gram Positive |
| Gt5a | Cocci, cluster | Purple | Gram Positive |
| Gt5b | Rods | Purple | Gram Positive |
| Jr3a | Cocci, cluster | Purple | Gram Positive |
| Jr3f | Rods | Purple | Gram Positive |
| Jr3h | Rods | Red | Gram Negative |
| Jr5c | Rods | Red | Gram Negative |
| Jr5e | Cocci, cluster | Purple | Gram Positive |

**SUPPLEMENTARY SECTION C**

**IDENTIFICATION FLOWCHART ACCORDING TO BERGEY’S MANUAL OF DETERMINATIVE BACTERIOLOGY**

**
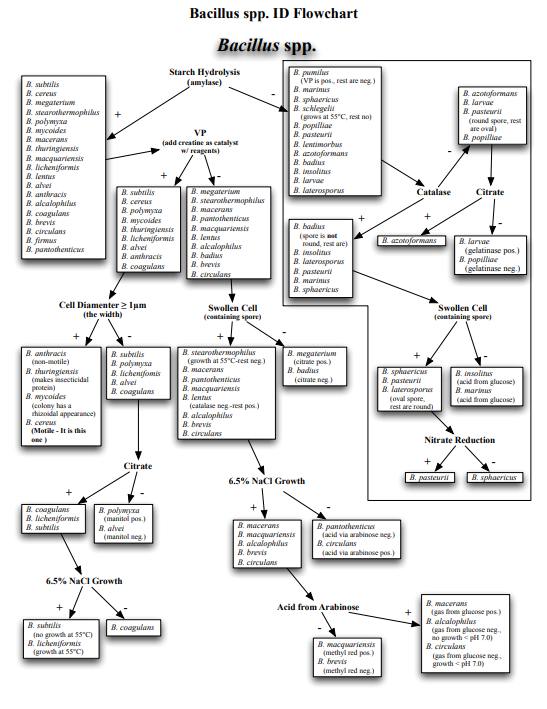
1. For *Bacillus* spp. (Gram positive rods)**

**
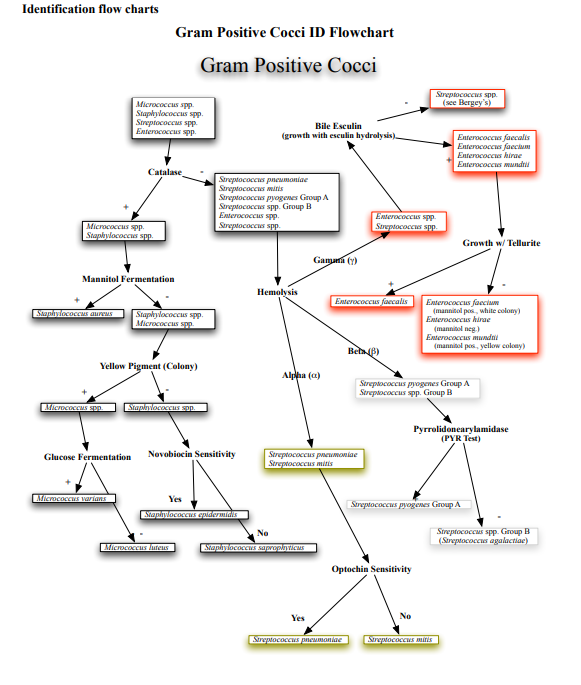
2. For Gram positive cocci**
